# Supplementary material for: Investigations on growth intensification of p-toluamide crystals based on growth rate analysis and molecular simulation
Source: Royal Society of Chemistry journal article supplement (doi:10.1039/c9ce00872a), 2019-01-01
Supplement: c9ce00872a1.pdf [file c9ce00872a1.pdf]

## Electronic Supplementary Information

### Investigations on Growth Intensification of *p*-Toluamide Crystal

#### Based on Growth Rate Analysis and Molecular Simulation

Hao Wu,<sup>a</sup> Jingkang Wang,<sup>ab</sup> Fei Li,<sup>\*ab</sup> Qi Liu,<sup>a</sup> Shuyi Zong,<sup>a</sup> Jingtao Bi,<sup>a</sup> Na Wang,<sup>a</sup> Guoqiang Shan,<sup>c</sup> and Hongxun Hao<sup>\*ab</sup>

<sup>a</sup> National Engineering Research Centre of Industrial Crystallization Technology, School of Chemical Engineering and Technology, Tianjin University, Tianjin, 300072, P R China.

\*E-mail: lifeijessie@tju.edu.cn, hongxunhao@tju.edu.cn.

<sup>b</sup> Collaborative Innovation Centre of Chemical Science and Engineering, Tianjin, P R China.

<sup>c</sup> The College of Environmental Science and Engineering, Nankai University, Tianjin 300072, China

#### Table of Contents

**Table S1.** Experimental mole fraction solubility of *p*-Toluamide in methanol from 293.1 K to 308.1 K under  $p = 101.3$  KPa.

**Fig. S1.** The schematic diagram of the model size ( $d_c$ ,  $d_s$ ,  $U \times V$  and  $d_v$ ).

**Fig. S2.** X-ray power diffraction patterns of *p*-toluamide crystals in methanol at 299.1 K without (A0) and with different additives (A1-A4).

**Fig. S3.** <sup>13</sup>C solid-state NMR spectra of *p*-toluamide crystals without (A0) and with different additives (A1-A4).

Table S1. Experimental mole fraction solubility of *p*-Toluamide in methanol from 293.1 K to 308.1 K under  $p = 101.3$  kPa.<sup>a</sup>

| $T / \text{K}$ | 293.1  | 298.1  | 303.1  | 308.1  |
|----------------|--------|--------|--------|--------|
| $x$            | 0.0271 | 0.0308 | 0.0358 | 0.0414 |

<sup>a</sup> Standard uncertainties are  $u(T) = 0.05$  K and  $u(p) = 0.3$  kPa. Relative standard uncertainty is  $ur(x) = 0.05$ .

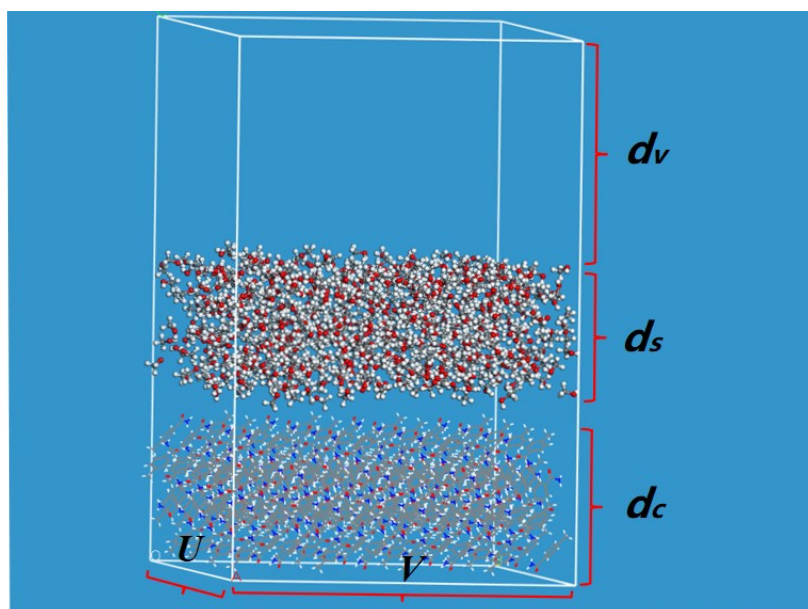

Fig.S1 The schematic diagram of the model size ( $d_c$ ,  $d_s$ ,  $U \times V$  and  $d_v$ ).

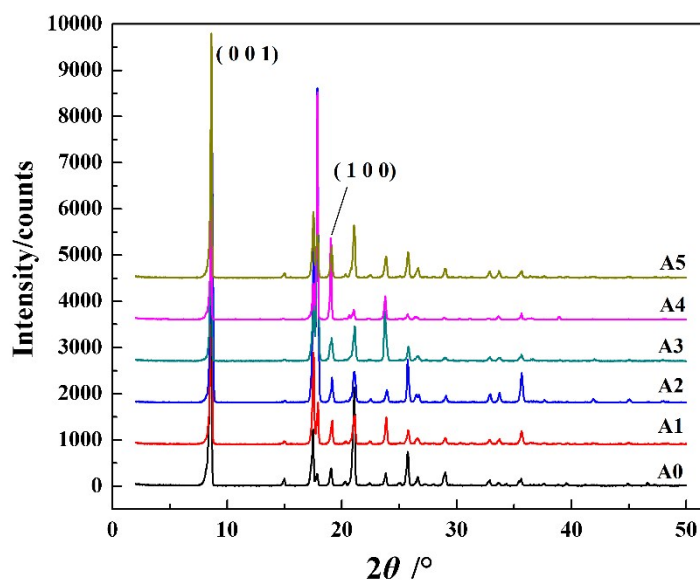

Fig. S2 X-ray power diffraction patterns of *p*-toluamide crystals in methanol at 299.1 K without (A0) and with different additives (A1-A4).

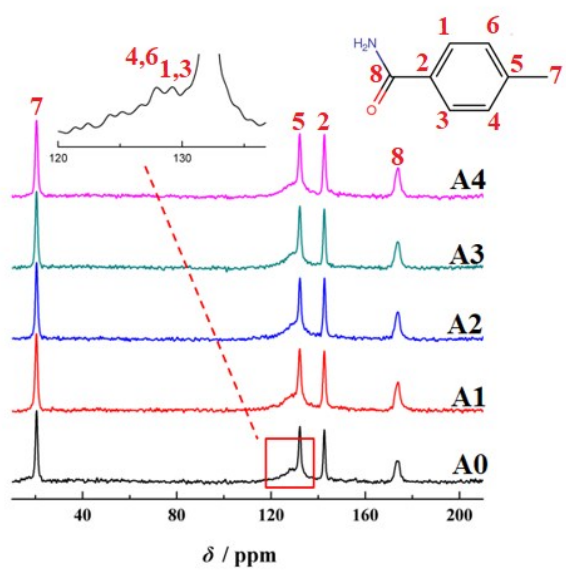

Fig. S3  $^{13}\text{C}$  solid-state NMR spectra of *p*-toluamide crystals without (A0) and with different additives (A1-A4).
